# Supplementary material for: Estrogen receptor beta as a prognostic factor in breast cancer patients: A systematic review and meta-analysis
Source: PubMed Central journal article supplement (PMC4891126; doi:10.18632/oncotarget.7219), 2016-02-06
Supplement: oncotarget-07-10373-s001.pdf [file oncotarget-07-10373-s001.pdf]

# Estrogen receptor beta as a prognostic factor in breast cancer patients: A systematic review and meta-analysis

## Supplementary Material

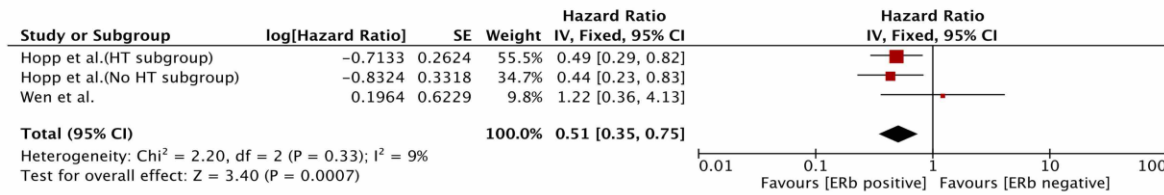

Figure S1. Prognostic role of IB-determined ER $\beta$  status for DFS. DFS, disease-free survival; IB, immunoblot; ER, estrogen receptor.

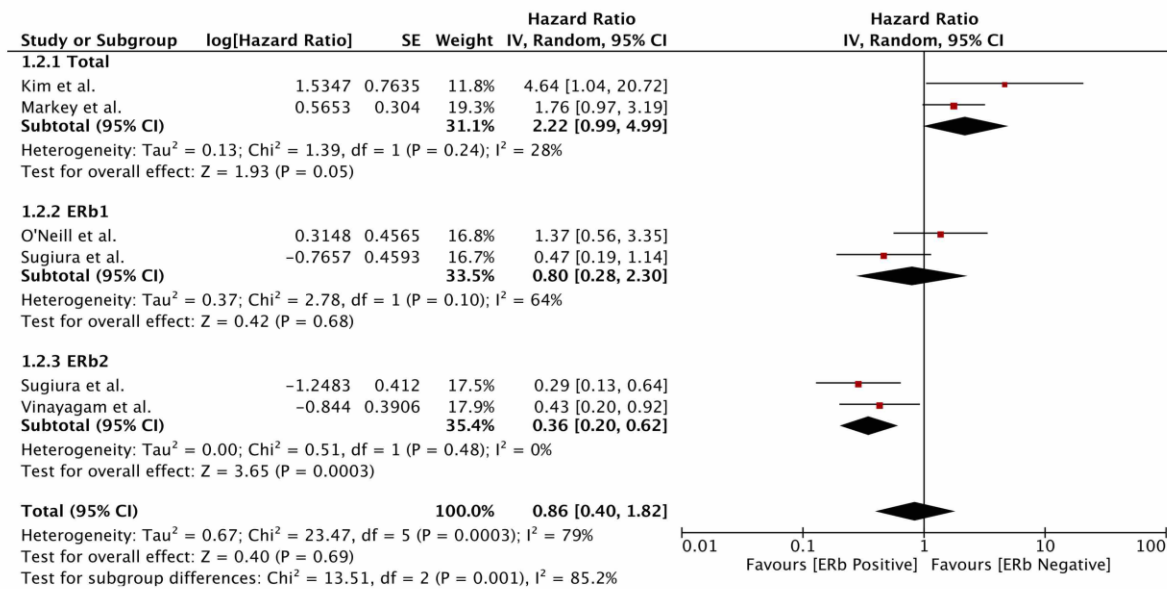

Figure S2. Prognostic role of PCR-determined ER $\beta$  status for DFS. DFS, disease-free survival; PCR, polymerase chain reaction; ER, estrogen receptor.

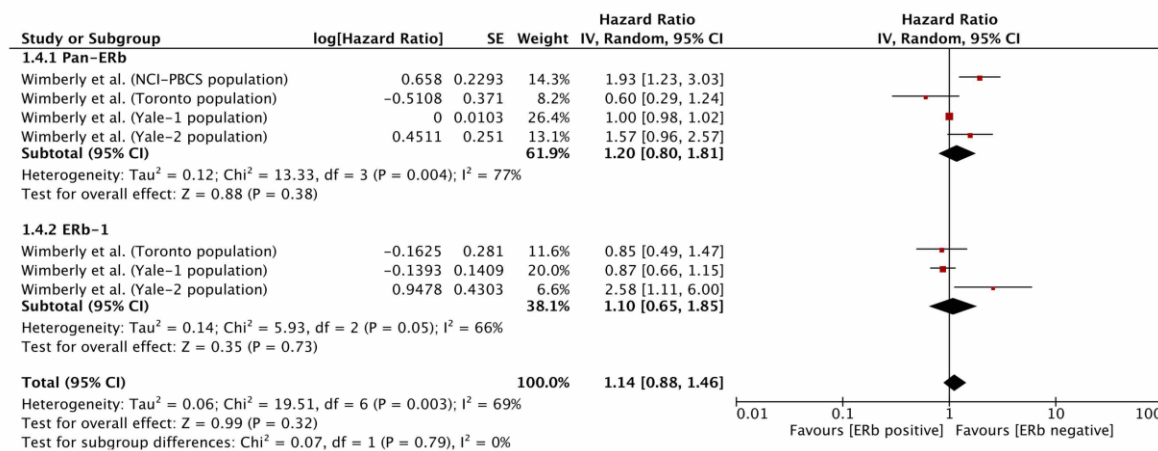

Figure S3. Prognostic role of TMA-determined ER $\beta$  status for DFS. DFS, disease-free survival; TMA, tissue microarray; ER, estrogen receptor.

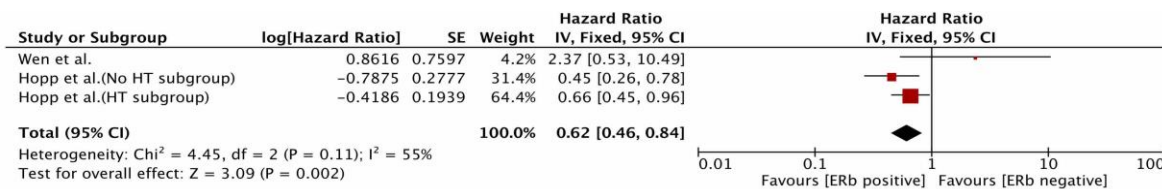

Figure S4. Prognostic role of IB-determined ER $\beta$  status for OS. OS, overall survival; IB, immunoblot; ER, estrogen receptor.

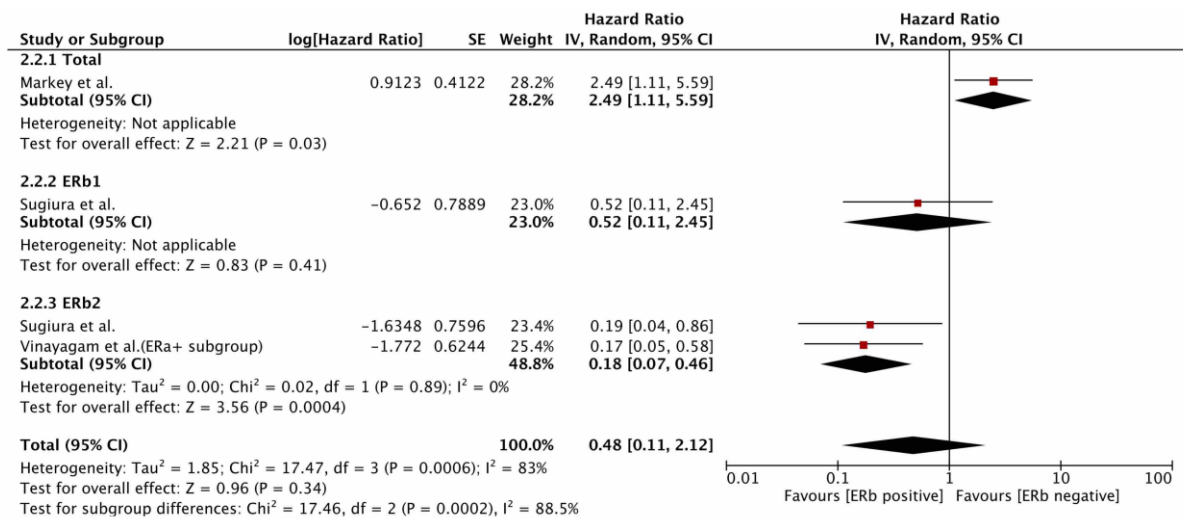

Figure S5. Prognostic role of PCR-determined ER $\beta$  status for OS. OS, overall survival; PCR, polymerase chain reaction; ER, estrogen receptor.

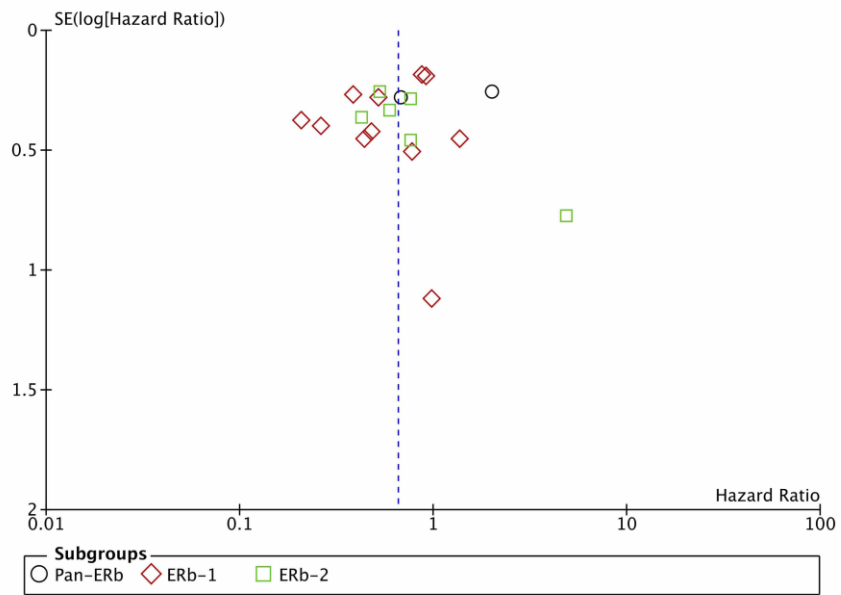

Figure S6. Funnel plots for assessing publication bias for DFS. Only studies assessing ER $\beta$  status using IHC were included. DFS, disease-free survival; IHC, immunohistochemistry.

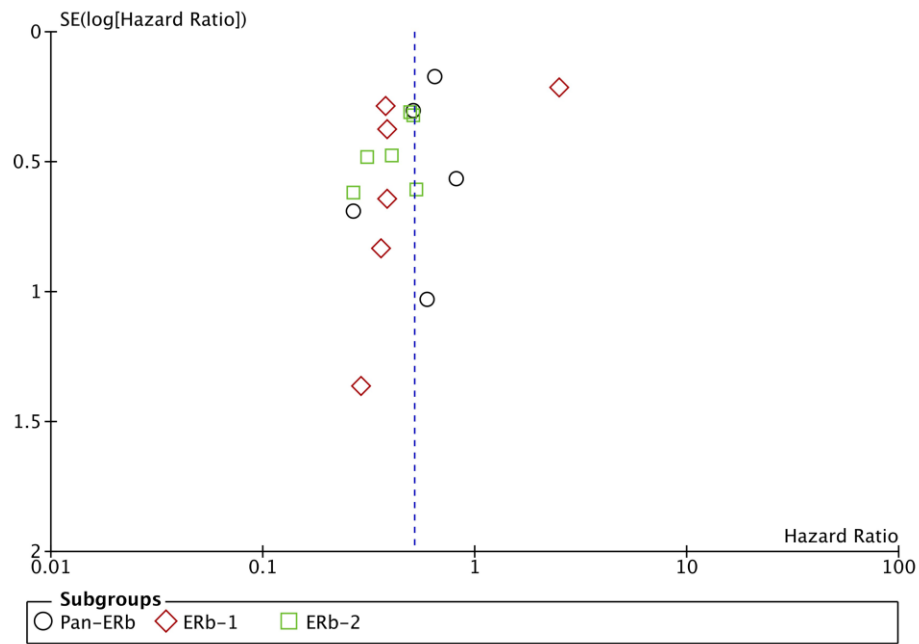

Figure S7. Funnel plots for assessing publication bias for OS. Only studies assessing ER $\beta$  status using IHC were included. OS, overall survival; IHC, immunohistochemistry.

Supplementary Table S1: Sensitivity analysis of survival in patients with different ERb(Total/ERb1/ERb2) status (IHC).

| Endpoints                   | Pan-ERb           |                 |  |                     | ERb-1 |                   |                 | ERb-2 |                   |                |                 |                     |    |                |      |
|-----------------------------|-------------------|-----------------|--|---------------------|-------|-------------------|-----------------|-------|-------------------|----------------|-----------------|---------------------|----|----------------|------|
|                             | Number of studies | Random effect   |  | Study heterogeneity |       | Number of studies | Random effect   |       | Number of studies | Random effect  |                 | Study heterogeneity |    |                |      |
|                             |                   | HR(95%CI)       |  | I <sup>2</sup>      | p     |                   | HR(95%CI)       |       |                   | I <sup>2</sup> | p               | HR(95%CI)           |    | I <sup>2</sup> | p    |
| DFS                         |                   |                 |  |                     |       |                   |                 |       |                   |                |                 |                     |    |                |      |
| Median follow-up >60 months |                   | N/A             |  |                     | 4     | 0.49(0.30,0.82)   |                 | 72%   | 0.010             | 4              | 0.63(0.46,0.86) |                     | 0% | 0.79           |      |
| Sample size ≥200            |                   | N/A             |  |                     | 4     | 0.72(0.48,1.07)   |                 | 61%   | 0.050             |                | N/A             |                     |    |                |      |
| OS                          |                   |                 |  |                     |       |                   |                 |       |                   |                |                 |                     |    |                |      |
| Median follow-up >60 months | 3                 | 0.60(0.45,0.80) |  | 0%                  | 0.71  | 4                 | 0.38(0.25,0.58) |       | 0%                | 1.000          | 5               | 0.46(0.32,0.65)     |    | 0%             | 0.92 |
| Sample size ≥200            |                   | N/A             |  |                     | 3     | 0.76(0.16,3.47)   |                 | 93%   | <0.001            |                | N/A             |                     |    |                |      |

NA, not available.

Supplementary Table S2: Origination and classification of HRs for DFS and OS.

| References             | Year | Data for DFS | Data for OS |
|------------------------|------|--------------|-------------|
| Vinayagam et al.       | 2007 | i,ii         | i ,i*,ii    |
| Honma et al.           | 2008 | i ,i*,ii     | i ,i*,ii    |
| Novelli et al.         | 2008 | i ,i*        |             |
| Gruvberger-Saal et al. | 2007 | i*,ii        | i*          |
| Mann et al.            | 2001 |              | i           |
| Mahle et al.           | 2009 |              | i*,ii       |
| Hopp et al.            | 2004 | i,ii         | i*,ii       |
| Borgquist et al.       | 2008 | i ,i*        |             |
| Palmieri et al.        | 2004 | i,ii         | i,ii        |
| Shaaban et al.         | 2008 | ii           | i*,ii       |
| Nakopoulou et al.      | 2004 | i*,ii        | i*,ii       |
| Myers et al.           | 2004 | i*           |             |
| Sugiura et al.         | 2007 | i*,ii        | i*,ii       |
| Omoto et al.           | 2002 | i*           |             |
| Omoto et al.           | 2001 | i*           |             |
| Yan et al.             | 2011 |              | i*          |
| Zhang et al.           | 2014 | i*           |             |
| O'Neill et al.         | 2004 | i*           |             |
| Guo et al.             | 2014 | i*,ii        |             |
| Chantzi et al.         | 2013 | i,ii         |             |
| Qui et al.             | 2009 | i*           | i*          |
| Markey et al.          | 2009 | i*           | i*,ii       |
| Kim et al.             | 2012 | i*,ii        |             |
| Wen et al.             | 2002 | ii           | ii          |
| Wimberly et al.        | 2014 | i*,ii        |             |

i Original data derived from univariable analysis ;

i\* Extracted data from survival curves as univariable analysis;

ii Original data derived from multivariable analysis ;
